# Supplementary material
Source: PubMed Central journal article supplement (PMC3244608)
Supplement: supp_kwr265_kwr265_Web_Appendix.pdf [file supp_kwr265_kwr265_Web_Appendix.pdf]

## WEB APPENDIX 1

### Stata program for dose-response meta-analysis

Stata code for Example 2 of this paper

```
/* Information about glst command is available here
http://nicolaorsini.altervista.org/stata/tutorial/g/glst.htm
*/

/* two-stage fixed-effect meta-analysis */

. glst logrr dose, se(se) cov(peryears cases) pfirst(study type) ts(f)

Two-stage fixed-effects dose-response model      Number of studies =      4

Generalized least-squares regression              Number of obs =      4
Goodness-of-fit chi2(3) =      6.13              Model chi2(1) =      9.50
Prob > chi2 =      0.1055                       Prob > chi2 =      0.0021
-----+-----
logrr |      Coef.   Std. Err.      z    P>|z|     [95% Conf. Interval]
-----+-----
dose |      .005548   .0018002    3.08   0.002     .0020197   .0090762
-----+-----

/* Relative risk for 12 grams/day incremental unit */

. lincom dose*12, eform

-----+-----
logrr |      exp(b)   Std. Err.      z    P>|z|     [95% Conf. Interval]
-----+-----
(1) |      1.068842   .023089     3.08   0.002     1.024533   1.115067
-----+-----

/* two-stage random-effect meta-analysis */

. glst logrr dose, se(se) cov(peryears cases) pfirst(study type) ts(r)

Two-stage random-effects dose-response model      Number of studies =      4

Generalized least-squares regression              Number of obs =      4
Goodness-of-fit chi2(3) =      6.13              Model chi2(1) =      4.40
Prob > chi2 =      0.1055                       Prob > chi2 =      0.0358
-----+-----
logrr |      Coef.   Std. Err.      z    P>|z|     [95% Conf. Interval]
-----+-----
dose |      .0054527   .0025981    2.10   0.036     .0003605   .010545
-----+-----
Moment-based estimate of between-study variance of the slope: tau2 = 0.0000137

/* Relative risk for 12 grams/day incremental unit */

. lincom dose*12, eform

-----+-----
logrr |      exp(b)   Std. Err.      z    P>|z|     [95% Conf. Interval]
-----+-----
(1) |      1.067621   .0332856    2.10   0.036     1.004336   1.134894
-----+-----
```

## WEB APPENDIX 2

### SAS program for dose-response meta-analysis

SAS code for Example 2 of this paper (partial, without revealing the actual data set for protection)

```
/** you need to download this macro from XXX's website in software section
http://www.hsph.harvard.edu/faculty/donna-spiegelman/software/
***/

%include "metadose.sas";

%metadose(dat=all, /** should have variables &ratio, &95UB, &dose, &Ncase, &Ntotal, &studyname **/
  ratio=rr, /** odds ratio for case-control, relative risk for cohort **/
  /*variance=variance,*/
  UB=ul,
  dose=nut_med, /** median dose for each exposure level */
  Ncase=cases, /** number of cases for each exposure level */
  Ntotal =peryears, /** total amount of person-time (cohort) or subjects (case-control) */
  studyname=study, /** study name, character value **/
  studytype=1,
  graphname_g=alc.lung.greenland.ps, /** for greenland method to get var-covar plot **/
  graphname_h=alc.lung.hamling.ps, /** for Hamling method to get var-covar plot **/
  wt=12, unit_wt=g/day, var_covar=GH,linearCheck=1,
  meta=T
);
```

-----  
These are the input data plus the estimated cell counts using both methods

| Obs | STUDY | Median dose | RR      | UL      | Cases | Greenland Est_Cases | Hamling Est_Cases | Actual Person-time | Hamling_Est Person-time |
|-----|-------|-------------|---------|---------|-------|---------------------|-------------------|--------------------|-------------------------|
| 1   | at    | 0.0000      | 1.00000 | .       | 45    | 36.678              | 38.612            | 5931.51            | 6254.08                 |
| 2   | at    | 1.8480      | 0.82433 | 1.22406 | 61    | 61.897              | 66.542            | 12143.00           | 13074.80                |
| 3   | at    | 9.0868      | 0.87490 | 1.27234 | 79    | 79.373              | 92.324            | 14671.52           | 17092.19                |
| 4   | at    | 22.8571     | 0.80515 | 1.19664 | 60    | 63.998              | 65.746            | 12854.30           | 13226.27                |
| 5   | at    | 45.5952     | 0.82968 | 1.25888 | 53    | 56.054              | 50.982            | 10925.75           | 9952.80                 |
| 6   | hp    | 0.0000      | 1.00000 | .       | 51    | 63.498              | 56.054            | 96659.16           | 87056.06                |
| 7   | hp    | 2.1000      | 0.79991 | 1.20884 | 41    | 52.228              | 37.638            | 99390.73           | 73075.96                |
| 8   | hp    | 9.5000      | 0.96763 | 1.39726 | 67    | 71.036              | 57.724            | 111751.78          | 92648.35                |
| 9   | hp    | 18.8000     | 0.50574 | 0.86916 | 18    | 17.842              | 17.087            | 53704.71           | 52472.27                |
| 10  | hp    | 40.3000     | 1.25836 | 1.83760 | 67    | 39.395              | 51.256            | 47656.96           | 63260.29                |
| 11  | nt    | 0.0000      | 1.00000 | .       | 111   | 105.078             | 47.706            | 1356.69            | 605.09                  |
| 12  | nt    | 2.2000      | 1.10632 | 1.57168 | 136   | 152.761             | 71.410            | 1782.74            | 818.69                  |
| 13  | nt    | 9.3000      | 1.19576 | 1.66387 | 200   | 227.500             | 99.507            | 2456.36            | 1055.50                 |
| 14  | nt    | 22.5000     | 1.10051 | 1.53745 | 193   | 176.422             | 93.262            | 2069.80            | 1074.87                 |
| 15  | nt    | 41.3000     | 1.69433 | 2.43712 | 188   | 166.239             | 57.408            | 1266.80            | 429.75                  |
| 16  | ny    | 0.0000      | 1.00000 | .       | 47    | 47.457              | 45.646            | 20756.52           | 20258.20                |
| 17  | ny    | 0.9667      | 0.72706 | 1.01658 | 135   | 151.156             | 135.113           | 90930.18           | 82476.19                |
| 18  | ny    | 11.4000     | 0.94785 | 1.35805 | 86    | 92.178              | 84.526            | 42533.97           | 39577.95                |
| 19  | ny    | 22.8000     | 0.84882 | 1.26343 | 53    | 49.353              | 51.656            | 25430.02           | 27009.01                |
| 20  | ny    | 45.6000     | 1.16348 | 1.69670 | 71    | 51.856              | 65.648            | 19493.39           | 25041.75                |

-----  
These are the point estimates and input data using both methods of meta-analysis for dose-response  
RR/OR is given in an increment of 12 g/day

| Obs | studyname | G_BSTAR     | G_SESTAR   | G_RRSTAR | H_BSTAR     | H_SESTAR   | H_RRSTAR |
|-----|-----------|-------------|------------|----------|-------------|------------|----------|
| 1   | at        | -.001846892 | .003596107 | 0.97808  | -.001985603 | .003636415 | 0.97645  |
| 2   | hp        | 0.006029110 | .004387492 | 1.07503  | 0.006744383 | .004329228 | 1.08430  |
| 3   | nt        | 0.009797354 | .003482907 | 1.12476  | 0.009525432 | .003567898 | 1.12109  |
| 4   | ny        | 0.007576733 | .003212849 | 1.09518  | 0.007859609 | .003127314 | 1.09891  |

-----

The following are the results from the meta regression

test for heterogeneity

| Model  | Method    | Pooled Est (SE) | RR/OR(CI)               | Z-score | linear trend p-value | tau**2 | p-value | Q      | df |
|--------|-----------|-----------------|-------------------------|---------|----------------------|--------|---------|--------|----|
| fixed  | Greenland | 0.0055( 0.0018) | 1.0688( 1.0245, 1.1151) | 3.0820  | 0.0021               |        | 0.1056  | 6.1279 | 3  |
| fixed  | Hamling   | 0.0057( 0.0018) | 1.0706( 1.0263, 1.1168) | 3.1650  | 0.0016               |        | 0.1045  | 6.1515 | 3  |
| Random | Greenland | 0.0055( 0.0026) | 1.0676( 1.0043, 1.1349) | 2.0988  | 0.0358               | 0.0000 |         |        |    |
| Random | Hamling   | 0.0056( 0.0026) | 1.0694( 1.0059, 1.1368) | 2.1489  | 0.0316               | 0.0000 |         |        |    |

=====  
 Assessment of non-linearity - p-values  
 =====

|                                        | Greenland | Hamling   |
|----------------------------------------|-----------|-----------|
| Test for non-linearity                 | 0.206691  | 0.1722052 |
| Test for overall significance of curve | 0.0017896 | 0.0011502 |
